# Supplementary material for: Lignins and Their Derivatives with Beneficial Effects on Human Health
Source: MDPI journal article supplement (doi:10.3390/ijms18061219), 2017-06-07
Supplement: s1 [file s1]

**JOHN WILEY AND SONS LICENSE  
TERMS AND CONDITIONS**

Mar 03, 2017

This Agreement between Pilar Vinardell ("You") and John Wiley and Sons ("John Wiley and Sons") consists of your license details and the terms and conditions provided by John Wiley and Sons and Copyright Clearance Center.

|                                                                                               |                                                                                                                        |
|-----------------------------------------------------------------------------------------------|------------------------------------------------------------------------------------------------------------------------|
| License Number                                                                                | 4061280689165                                                                                                          |
| License date                                                                                  | Mar 03, 2017                                                                                                           |
| Licensed Content Publisher                                                                    | John Wiley and Sons                                                                                                    |
| Licensed Content Publication                                                                  | Basic & Clinical Pharmacology & Toxicology                                                                             |
| Licensed Content Title                                                                        | Lignophenols Decrease Oleate-Induced Apolipoprotein-B Secretion in HepG2 Cells                                         |
| Licensed Content Author                                                                       | Toshio Norikura,Yuuka Mukai,Shuzo Fujita,Keigo Mikame,Masamitsu Funaoka,Shin Sato                                      |
| Licensed Content Date                                                                         | Apr 20, 2010                                                                                                           |
| Licensed Content Pages                                                                        | 5                                                                                                                      |
| Type of use                                                                                   | Journal/Magazine                                                                                                       |
| Requestor type                                                                                | University/Academic                                                                                                    |
| Is the reuse sponsored by or no associated with a pharmaceutical or medical products company? |                                                                                                                        |
| Format                                                                                        | Print                                                                                                                  |
| Portion                                                                                       | Figure/table                                                                                                           |
| Number of figures/tables                                                                      | 1                                                                                                                      |
| Original Wiley figure/table number(s)                                                         | Figure 5                                                                                                               |
| Will you be translating?                                                                      | No                                                                                                                     |
| Circulation                                                                                   | 1000                                                                                                                   |
| Title of new article                                                                          | Lignins and their derivatives with beneficial effects on human health                                                  |
| Publication the new article is in                                                             | International Journal of Molecular Sciences                                                                            |
| Publisher of new article                                                                      | MDPI AG                                                                                                                |
| Author of new article                                                                         | Vinardell MP, Mitjans M                                                                                                |
| Expected publication date of new article                                                      | Oct 2017                                                                                                               |
| Estimated size of new article (pages)                                                         | 8                                                                                                                      |
| Requestor Location                                                                            | Pilar Vinardell<br>Facultat de Farmacia<br>Av Joan XXIII s/n<br><br>Barcelona, 08028<br>Spain<br>Attn: Pilar Vinardell |
