# Supplementary material for: Lignins and Their Derivatives with Beneficial Effects on Human Health
Source: MDPI journal article supplement (doi:10.3390/ijms18061219), 2017-06-07
Supplement: s1 [file s1]

# The Low-Cost Compound Lignosulfonic Acid (LA) Exhibits Broad-Spectrum Anti-HIV and Anti-HSV Activity and Has Potential for Microbicidal Applications

[Stephanie C. Gordts](#),<sup>#1</sup> [Geoffrey Férir](#),<sup>#1,\*</sup> [Thomas D'huys](#),<sup>1</sup> [Mariya I. Petrova](#),<sup>2,3</sup> [Sarah Lebeer](#),<sup>2,3</sup> [Robert Snoeck](#),<sup>1</sup> [Graciela Andrei](#),<sup>1</sup> and [Dominique Schols](#)<sup>1</sup>

Roberto F. Speck, Editor

[Author information](#) ► [Article notes](#) ► [Copyright and License information](#) ▼  
[Copyright notice](#)

This is an open access article distributed under the terms of the [Creative Commons Attribution License](#), which permits unrestricted use, distribution, and reproduction in any medium, provided the original author and source are credited
