# Supplementary material for: Lignins and Their Derivatives with Beneficial Effects on Human Health
Source: MDPI journal article supplement (doi:10.3390/ijms18061219), 2017-06-07
Supplement: s1 [file s1]

**ELSEVIER LICENSE  
TERMS AND CONDITIONS**

Mar 02, 2017

This Agreement between Pilar Vinardell ("You") and Elsevier ("Elsevier") consists of your license details and the terms and conditions provided by Elsevier and Copyright Clearance Center.

|                                              |                                                                                                                                                                                                                                                                      |
|----------------------------------------------|----------------------------------------------------------------------------------------------------------------------------------------------------------------------------------------------------------------------------------------------------------------------|
| License Number                               | 4060790101381                                                                                                                                                                                                                                                        |
| License date                                 | Mar 02, 2017                                                                                                                                                                                                                                                         |
| Licensed Content Publisher                   | Elsevier                                                                                                                                                                                                                                                             |
| Licensed Content Publication                 | Biomaterials                                                                                                                                                                                                                                                         |
| Licensed Content Title                       | In vitro evaluation of biodegradable lignin-based nanoparticles for drug delivery and enhanced antiproliferation effect in cancer cells                                                                                                                              |
| Licensed Content Author                      | Patricia Figuelredo, Kalle Lintinen, Alexandros Kiriazis, Ville Hynninen, Zehua Liu, Tomás Bauleth-Ramos, Antti Rahikkala, Alexandra Correia, Tomáš Kohout, Bruno Sarmento, Jari Yli-Kauhaluoma, Jouni Hirvonen, Olli Ikkala, Mauri A. Kostiaainen, Hélder A. Santos |
| Licensed Content Date                        | March 2017                                                                                                                                                                                                                                                           |
| Licensed Content Volume                      | 121                                                                                                                                                                                                                                                                  |
| Licensed Content Issue                       | n/a                                                                                                                                                                                                                                                                  |
| Licensed Content Pages                       | 12                                                                                                                                                                                                                                                                   |
| Start Page                                   | 97                                                                                                                                                                                                                                                                   |
| End Page                                     | 108                                                                                                                                                                                                                                                                  |
| Type of Use                                  | reuse in a journal/magazine                                                                                                                                                                                                                                          |
| Requestor type                               | author of new work                                                                                                                                                                                                                                                   |
| Intended publisher of new work               | MDPI AG                                                                                                                                                                                                                                                              |
| Portion                                      | figures/tables/illustrations                                                                                                                                                                                                                                         |
| Number of figures/tables /illustrations      | 1                                                                                                                                                                                                                                                                    |
| Format                                       | print                                                                                                                                                                                                                                                                |
| Are you the author of this Elsevier article? | No                                                                                                                                                                                                                                                                   |
| Will you be translating?                     | No                                                                                                                                                                                                                                                                   |
| Order reference number                       |                                                                                                                                                                                                                                                                      |
| Original figure numbers                      | Figure 1                                                                                                                                                                                                                                                             |
| Title of the article                         | Lignins and their derivatives with beneficial effects on human health                                                                                                                                                                                                |
| Publication new article is in                | International Journal of Molecular Sciences                                                                                                                                                                                                                          |
| Publisher of the new article                 | MDPI AG                                                                                                                                                                                                                                                              |
| Author of new article                        | Vinardell MP, Mitjans M                                                                                                                                                                                                                                              |
| Expected publication date                    | Oct 2017                                                                                                                                                                                                                                                             |
