# Supplementary material for: Lignins and Their Derivatives with Beneficial Effects on Human Health
Source: MDPI journal article supplement (doi:10.3390/ijms18061219), 2017-06-07
Supplement: s1 [file s1]

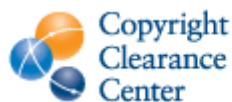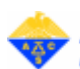

**Title:** The Catalytic Valorization of Lignin for the Production of Renewable Chemicals

**Author:** Joseph Zakzeski, Pieter C. A. Bruijninx, Anna L. Jongerius, et al

**Publication:** Chemical Reviews

**Publisher:** American Chemical Society

**Date:** Jun 1, 2010

Copyright © 2010, American Chemical Society

Logged in as:

Pilar Vinardell

Account #:  
3000631795

[LOGOUT](#)

## PERMISSION/LICENSE IS GRANTED FOR YOUR ORDER AT NO CHARGE

This type of permission/license, instead of the standard Terms & Conditions, is sent to you because no fee is being charged for your order. Please note the following:

- Permission is granted for your request in both print and electronic formats, and translations.
- If figures and/or tables were requested, they may be adapted or used in part.
- Please print this page for your records and send a copy of it to your publisher/graduate school.
- Appropriate credit for the requested material should be given as follows: "Reprinted (adapted) with permission from (COMPLETE REFERENCE CITATION). Copyright (YEAR) American Chemical Society." Insert appropriate information in place of the capitalized words.
- One-time permission is granted only for the use specified in your request. No additional uses are granted (such as derivative works or other editions). For any other uses, please submit a new request.

If credit is given to another source for the material you requested, permission must be obtained from that source.

[BACK](#)

[CLOSE WINDOW](#)
