# Supplementary material for: Lignins and Their Derivatives with Beneficial Effects on Human Health
Source: MDPI journal article supplement (doi:10.3390/ijms18061219), 2017-06-07
Supplement: s1 [file s1]

**ELSEVIER LICENSE  
TERMS AND CONDITIONS**

Mar 02, 2017

This Agreement between Pilar Vinardell ("You") and Elsevier ("Elsevier") consists of your license details and the terms and conditions provided by Elsevier and Copyright Clearance Center.

|                                                 |                                                                                                                                                                                                         |
|-------------------------------------------------|---------------------------------------------------------------------------------------------------------------------------------------------------------------------------------------------------------|
| License Number                                  | 4060820203361                                                                                                                                                                                           |
| License date                                    | Mar 02, 2017                                                                                                                                                                                            |
| Licensed Content Publisher                      | Elsevier                                                                                                                                                                                                |
| Licensed Content Publication                    | Thrombosis Research                                                                                                                                                                                     |
| Licensed Content Title                          | Sulfated low molecular weight lignins, allosteric inhibitors of coagulation proteinases via the heparin binding site, significantly alter the active site of thrombin and factor xa compared to heparin |
| Licensed Content Author                         | Brian L. Henry, Umesh R. Desai                                                                                                                                                                          |
| Licensed Content Date                           | November 2014                                                                                                                                                                                           |
| Licensed Content Volume                         | 134                                                                                                                                                                                                     |
| Licensed Content Issue                          | 5                                                                                                                                                                                                       |
| Licensed Content Pages                          | 7                                                                                                                                                                                                       |
| Start Page                                      | 1123                                                                                                                                                                                                    |
| End Page                                        | 1129                                                                                                                                                                                                    |
| Type of Use                                     | reuse in a journal/magazine                                                                                                                                                                             |
| Requestor type                                  | author of new work                                                                                                                                                                                      |
| Intended publisher of new work                  | MDPI AG                                                                                                                                                                                                 |
| Portion                                         | figures/tables/illustrations                                                                                                                                                                            |
| Number of figures/tables/illustrations          | 1                                                                                                                                                                                                       |
| Format                                          | print                                                                                                                                                                                                   |
| Are you the author of this Elsevier article?    | No                                                                                                                                                                                                      |
| Will you be translating?                        | No                                                                                                                                                                                                      |
| Order reference number                          |                                                                                                                                                                                                         |
| Original figure numbers                         | Figure 1                                                                                                                                                                                                |
| Title of the article                            | Lignins and their derivatives with beneficial effects on human health                                                                                                                                   |
| Publication new article is in                   | International Journal of Molecular Sciences                                                                                                                                                             |
| Publisher of the new article                    | MDPI AG                                                                                                                                                                                                 |
| Author of new article                           | Vinardell MP, Mitjans M                                                                                                                                                                                 |
| Expected publication date                       | Oct 2017                                                                                                                                                                                                |
| Estimated size of new article (number of pages) | 8                                                                                                                                                                                                       |
| Elsevier VAT number                             | GB 494 6272 12                                                                                                                                                                                          |
| Requestor Location                              | Pilar Vinardell<br>Facultat de Farmacia                                                                                                                                                                 |
