# Supplementary material for: Lignins and Their Derivatives with Beneficial Effects on Human Health
Source: Int J Mol Sci. 2017 Jun 7;18(6):1219. doi: 10.3390/ijms18061219 (PMC5486042; doi:10.3390/ijms18061219)
Supplement: Supplementary file 1 [file ijms-18-01219-s001.zip]

Archive with 7 entries (7 files):
- permisos/Figure 1. Zakseski.pdf
- permisos/Figure 2 Hasegawas 2017.pdf
- permisos/Figure 3 Norikura 2010.pdf
- permisos/Figure 4 Gordts 2015.pdf
- permisos/Figure 5 Henry.pdf
- permisos/Figure 6 Figuereido 2017.pdf
- permisos/Figure 7 Guitierrez.pdf
